# Supplementary material for: Future Changes in the Surface Water Balance over Western Canada Using the CanESM5 (CMIP6) Ensemble for the Shared Socioeconomic Pathways 5 Scenario
Source: MDPI journal article supplement (doi:10.3390/w14050691), 2022-02-22
Supplement: s1 [file s1]

Archive with 1 entries (1 files):
- water-1574676-supplementary.pdf
