# Supplementary material for: Future Changes in the Surface Water Balance over Western Canada Using the CanESM5 (CMIP6) Ensemble for the Shared Socioeconomic Pathways 5 Scenario
Source: MDPI journal article supplement (doi:10.3390/w14050691), 2022-02-22
Supplement: s1 [file s1 › water-1574676-supplementary.pdf]

## Supplementary Materials

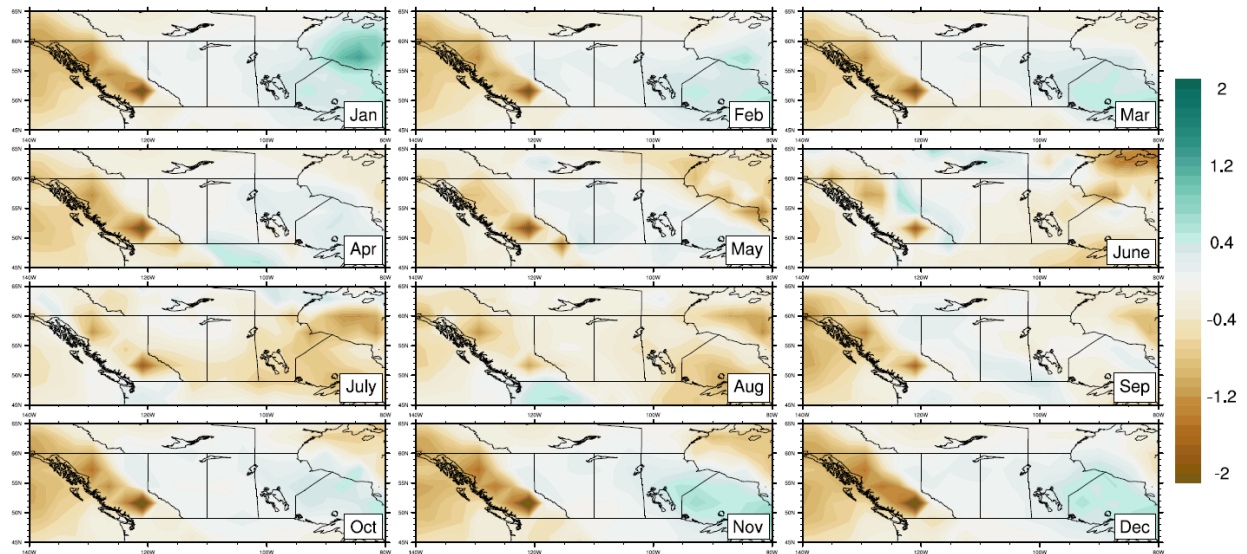

**Figure S1** Monthly NWBF change (Near Future – Historical).

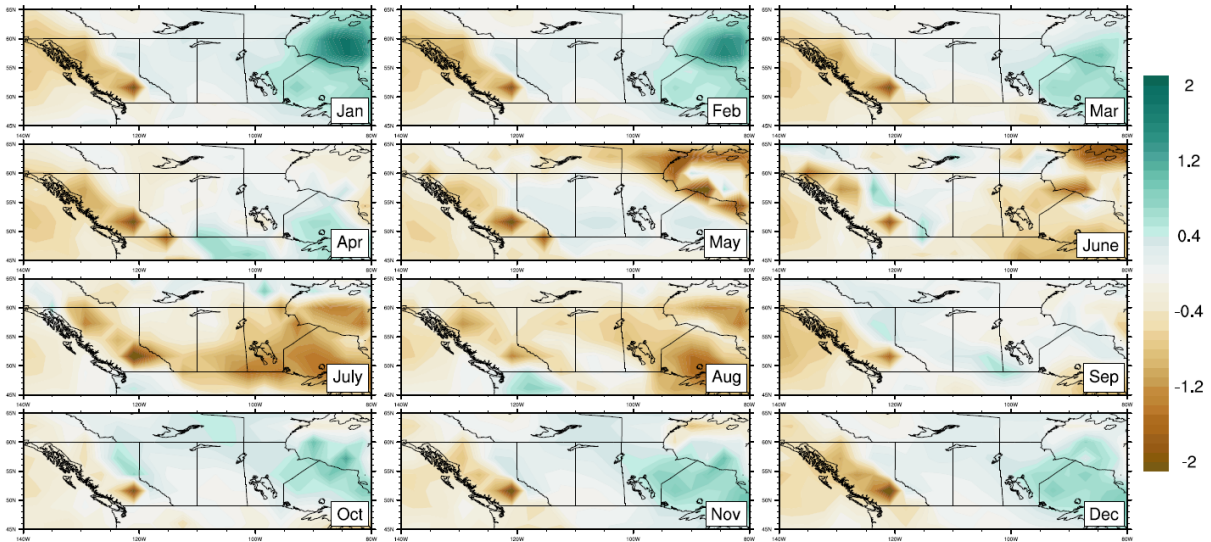

**Figure S2** Monthly NWBF change (Far Future – Historical).

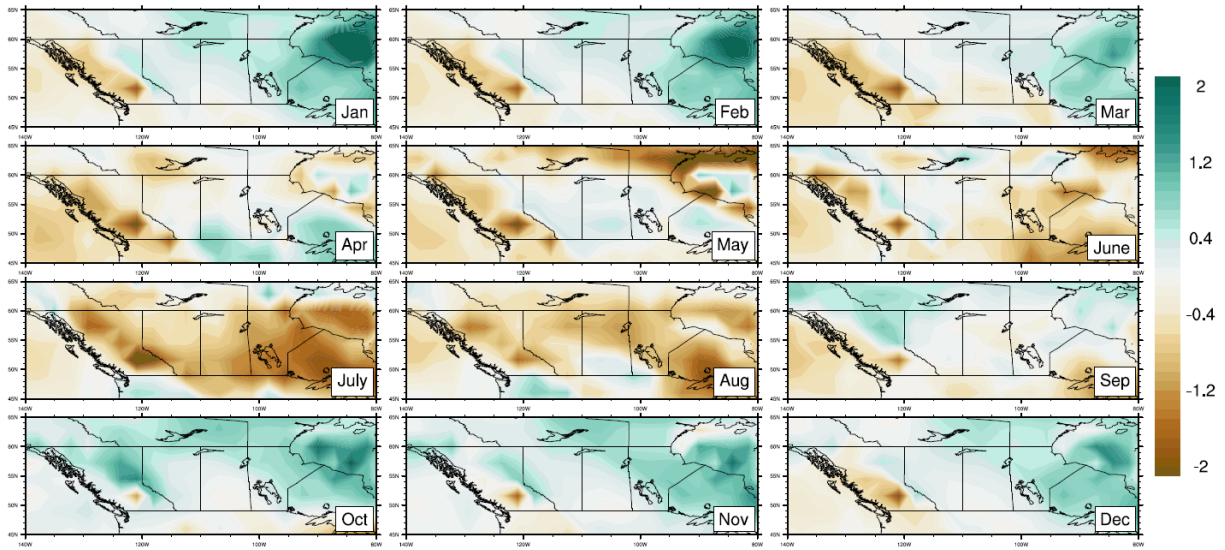

**Figure S3** Monthly NWBF (End of the Century – Historical).
